# Supplementary material for: Entwicklung und Validierung der Skalen zur motivationalen Regulation beim Lernen im Studium (SMR-LS)
Source: Atypon-hosted journal article supplement (doi:10.1026/0012-1924/a000201), 2018-03-02
Supplement: 0012-1924_a000201_esm1.pdf [file 0012-1924_a000201_esm1.pdf]

Elektronisches Supplement 1. Mittelwerte und Standardabweichungen der Teilstichproben

|                                    | Intrinsisch   |             | Identifiziert |             | Introjiert    |             | External      |             |
|------------------------------------|---------------|-------------|---------------|-------------|---------------|-------------|---------------|-------------|
|                                    | <i>M (SD)</i> |             | <i>M (SD)</i> |             | <i>M (SD)</i> |             | <i>M (SD)</i> |             |
|                                    | D             | AUT         | D             | AUT         | D             | AUT         | D             | AUT         |
| Erziehungswissenschaft/Psychologie |               |             |               |             |               |             |               |             |
| männlich                           | 3.76 (1.38)   | 5.33 (0.90) | 4.16 (1.58)   | 5.69 (0.89) | 3.50 (1.22)   | 4.26 (1.46) | 4.42 (1.42)   | 3.81 (1.13) |
| ( $n_D = 32, n_{AUT} = 14$ )       |               |             |               |             |               |             |               |             |
| weiblich                           | 4.32 (1.13)   | 5.02 (1.06) | 5.00 (1.11)   | 5.66 (1.13) | 4.52 (1.21)   | 4.54 (1.34) | 4.13 (1.38)   | 4.47 (1.50) |
| ( $n_D = 54, n_{AUT} = 90$ )       |               |             |               |             |               |             |               |             |
| gesamt <sup>a</sup>                | 4.11 (1.25)   | 5.06 (1.04) | 4.67 (1.34)   | 5.66 (1.09) | 4.15 (1.29)   | 4.50 (1.35) | 4.25 (1.37)   | 4.37 (1.49) |
| ( $n_D = 89, n_{AUT} = 104$ )      |               |             |               |             |               |             |               |             |
| Wirtschaftswissenschaften          |               |             |               |             |               |             |               |             |
| männlich                           | 4.09 (1.03)   | 5.07 (0.99) | 4.92 (1.08)   | 5.44 (1.03) | 4.03 (1.26)   | 4.18 (1.79) | 5.09 (1.19)   | 4.25 (1.87) |
| ( $n_D = 92, n_{AUT} = 19$ )       |               |             |               |             |               |             |               |             |
| weiblich                           | 4.02 (0.95)   | 5.07 (1.10) | 4.86 (1.19)   | 5.71 (0.91) | 4.35 (1.14)   | 4.82 (1.46) | 5.09 (1.50)   | 4.85 (1.24) |
| ( $n_D = 41, n_{AUT} = 28$ )       |               |             |               |             |               |             |               |             |
| gesamt                             | 4.07 (1.00)   | 5.00 (1.05) | 4.89 (1.11)   | 5.55 (0.97) | 4.12 (1.23)   | 4.57 (1.56) | 5.09 (1.29)   | 4.68 (1.49) |
| ( $n_D = 134, n_{AUT} = 52$ )      |               |             |               |             |               |             |               |             |
| Lehramt                            |               |             |               |             |               |             |               |             |
| männlich                           | 4.11 (0.99)   | 4.94 (1.04) | 4.96 (1.14)   | 5.48 (1.08) | 3.38 (1.53)   | 3.87 (1.22) | 3.71 (1.47)   | 3.98 (1.39) |

( $n_D = 31$ ,  $n_{AUT} = 42$ )

weiblich                    4.54 (0.99)    5.19 (1.15)    5.37 (1.02)    5.90 (1.12)    4.21 (1.45)    4.01 (1.34)    4.35 (1.34)    3.81 (1.50)

( $n_D = 121$ ,  $n_{AUT} = 110$ )

gesamt                    4.45 (1.00)    5.12 (1.12)    5.29 (1.05)    5.78 (1.12)    4.03 (1.50)    3.97 (1.28)    4.23 (1.38)    3.85 (1.46)

( $n_D = 153$ ,  $n_{AUT} = 155$ )

---

Gesamtstichprobe

gesamt                    4.62 (1.16)                    5.32 (1.19)                    4.16 (1.37)                    4.37 (1.46)

( $N = 687$ )

---

Anmerkungen. D = Deutschland, AUT = Österreich; Antwortskala von *stimme überhaupt nicht zu* (1) bis *stimme völlig zu* (7).

<sup>a</sup> Insgesamt 13 Studierende haben kein Geschlecht angegeben.
